# Supplementary material for: Acid-tolerant Lactiplantibacillus plantarum ZDY2013 shows a colonization niche preference and interacts with enterotoxigenic Bacillus cereus in specific-pathogen-free mice
Source: Royal Society of Chemistry journal article supplement (doi:10.1039/d3fo01468a), 2023-01-01
Supplement: d3fo01468a1.xlsx [file d3fo01468a1.xlsx]

## Sheet: Sheet1
Oligonucleotides used for L. plantarum ZDY2013 primers (zdy) design
Source	Name	Sequence	ID in Genbank
Whole genome sequence	ZDY2013GL000876	ACCAAAGAAGATAATGAAAATGGCTATGATGATGCATTCTTAAATGAAGTTATTGAAAAAGATGAAATTGACCGCTTATTTGATAAGAAGATATTAAATAATGTGAAAAGATATGATGTTGACGGGGAAAAAGATACTGATTGTTTTGATACAGAAAAAGATAATCTAATTATCAAAGGGAATAATTTATTGGCATTACATACATTAGCAGACAAGTATGCAAGTAGAATTAAAATGATTTATGTTGACGTACCATATTATTTTAAAAAAAAGATTTCGGAAGATTCTTTTAAGTACAATTCCAATTTTCATTTATCAGCATGGCTAACTTTTTTGAAGAATAGGTTGGAAATTGCAAAGCAGCTAATGTCTGAAAATGGATCAATATGGATAAATATT…	Accession: PRJNA476217
